# Supplementary material for: Construction of Probiotic Escherichia coli Nissle 1917 as a Next- Generation Expression Platform and Its Application in Therapeutic Protein Production
Source: Research Square preprint supplement (doi:10.21203/rs.3.rs-7512809/v1), 2025-09-19
Supplement: Supplementary file 1 [file ec441dc9cef0561dadc67228.docx]

**Table S1**. Strains and plasmids used in this study.

| **Strains/plasmids** | **Genotype or relevant** | **Source/Ref** |
| --- | --- | --- |
| **Strains** |  |  |
| *E. coli* DH5α | Plasmid cloning | Vazyme Biotech Co., Ltd (Nan Jing) |
| *E. coli* BL21(DE3) | Protein expression | Vazyme Biotech Co., Ltd (Nan Jing) |
| EcN::T7Δ*ompT* | *ompT* gene deficiency | This study |
| EcN::T7 Δ*lon* | *lon* gene deficiency | This study |
| EcN::T7Δ*iclR* | *iclR* gene deficiency | This study |
| EcN::T7Δ*arcA* | *arcA* gene deficiency | This study |
| EcN::T7Δ*ompT*Δ*iclR* | *ompT*、*iclR* gene deficiency | This study |
| EcN::T7Δ*ompT*Δ*arcA* | *ompT*、*arcA* gene deficiency | This study |
| EcN::T7Δ*iclR*Δ*arcA* | *iclR、arcA* gene deficiency | This study |
| EcN::T7Δ*ompT*Δ*iclR*Δ*arcA* | *ompT*、*iclR*、*arcA* gene deficiency | This study |
| **Plasmid** |  |  |
| pET28a-GFP | T7 promotor | This study |
| pCas | Cas9 | This study |
| pTargetF-N20-*ompT* | sgRNA-*ompT* | This study |
| pTargetF-N20-*lon* | sgRNA-*lon* | This study |
| pTargetF-N20-*iclR* | sgRNA-*iclR* | This study |
| pTargetF-N20-*arcA* | sgRNA-*arcA* | This study |

**Table S2**. Primers used in this study.

| **primer** | **sequences** |
| --- | --- |
| N20-*ompT*-F | atccggccatgagtcccaggGTTTTAGAGCTAGAAATAGCAAGTTAA |
| N20-*ompT*-R | cctgggactcatggccggatACTAGTATTATACCTAGGACTGAGCTAGC |
| N20-*lon*-F | tagaaccgatgtaagtacggGTTTTAGAGCTAGAAATAGCAAGTTAAA |
| N20-*lon*-R | ccgtacttacatcggttctaACTAGTATTATACCTAGGACTGAGCTAGC |
| N20-*iclR*-F | acgatgaggaacatgcgctgGTTTTAGAGCTAGAAATAGCAAGTTAAA |
| N20-*iclR*-R | cagcgcatgttcctcatcgtACTAGTATTATACCTAGGACTGAGCTAGC |
| N20-*arcA*-F | aggtacgtttaatcaccacgGTTTTAGAGCTAGAAATAGCAAGTTAAA |
| N20-*arcA*-R | cgtggtgattaaacgtacctACTAGTATTATACCTAGGACTGAGCTAGC |
| H1-*ompT*-F | aagtggcaccgagtcggtgcAACTGCCCCTGATATTGAGTG |
| H1-*ompT*-R | cgattgaatggagaccttttCAACGTTAAATAGATTTTCTCCCC |
| H2-*ompT*-F | agaaaatctatttaacgttgAAAAGGTCTCCATTCAATCGTT |
| H2-*ompT*-R | ctctagagaattcaaaaaaaTTCGCCGGAAACATGTCG |
| H1-*lon*-F | aagtggcaccgagtcggtgcGGCGAAGACGTTGAAAACATCATT |
| H1-*lon*-R | gtgcattttgcgcgaggtcaAGAGCTCTCTCTTAGTTTAATTTCCG |
| H2-*lon*-F | ttaaactaagagagagctctTGACCTCGCGCAAAATG |
| H2-*lon*-R | ctctagagaattcaaaaaaaGTTTCAGCTCACGAGCGT |
| H1-*iclR*-F | aagtggcaccgagtcggtgcGCATTCCGCAATACGCG |
| H1-*iclR*-R | ataaatcagaggcgaaaaagGACAGTCTCCTTTTTCTGTATCGT |
| H2-*iclR*-F | tacagaaaaaggagactgtcCTTTTTCGCCTCTGATTTATACG |
| H2-*iclR*-R | ctctagagaattcaaaaaaaATTGTTTTTGGCTTTGCGC |
| H1-*arcA*-F | aagtggcaccgagtcggtgcTCGATCCCCTGCCCG |
| H1-*arcA*-R | tgttttccatgatctcttccCATTATTCCTTTAACACTTTTTCAAA |
| H2-*arcA*-F | aaagtgttaaaggaataatgGGAAGAGATCATGGAAAACAAAC |
| H2-*arcA*-R | ctctagagaattcaaaaaaaTAAGAAAATTACGGTTTTTCAGTGA |
| pTargetF-*ompT*-F | ggcgacatgtttccggcgaatttttttgaattctctagagtcgaCC |
| pTargetF-*ompT*-R | actcaatatcaggggcagttGCACCGACTCGGTGCCA |
| pTargetF-*lon*-F | acgctcgtgagctgaaactttttttgaattctctagagtcga |
| pTargetF-*lon*-R | aatgatgttttcaacgtcttcgccGCACCGACTCGGTGCC |
| pTargetF-*iclR*-F | cgcgcaaagccaaaaacaattttttttgaattctctagagtcga |
| pTargetF-*iclR*-R | tgtcgcgtattgcggaatgcGCACCGACTCGGTGCC |
| pTargetF-*arcA*-F | gaaaaaccgtaattttcttatttttttgaattctctagagtcga |
| pTargetF-*arcA*-R | tttatcgggcaggggatcgagcaccgactcggtgccac |
| *ompT*-test-F | TTGCTGAACCGAGTTGATACAT |
| *ompT*-test-R | CAGCAAAACCGGTTTATATCAGTA |
| *lon*-test-F | TGACGCAACCACGCTGA |
| *lon*-test-R | CCTGCTCATCGCTGATACCC |
| *iclR*-test-F | CGACGGCGAGTTATTTATTGA |
| *iclR*-test-R | GCGTCGAGATCGTATTCACC |
| *arcA*-test-F | TCGTTTCCAGATTTCTTGGC |
| *arcA*-test-R | AGCGGTTTGTGAACTTCGC |


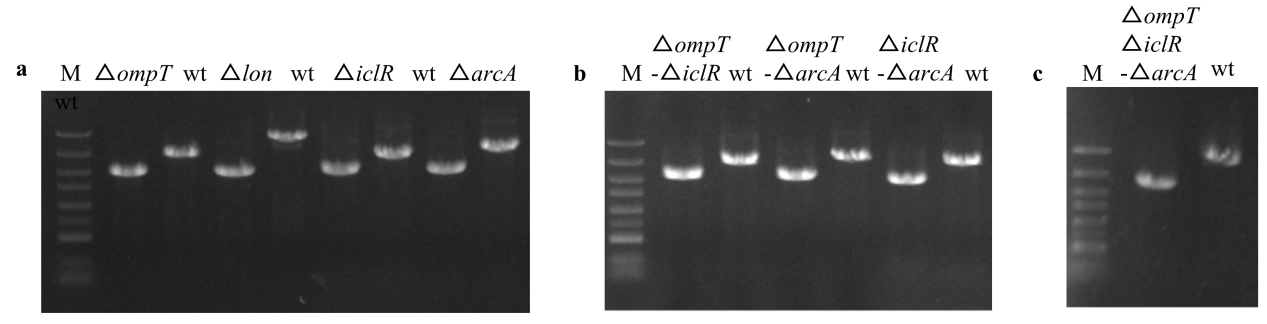


**Figure S1**. PCR gel electrophoresis of EcN engineering strain.
